# Supplementary material
Source: PubMed Central journal article supplement (PMC9771997)
Supplement: NIHMS1832479-supplement-Supplemental_Publication_Material.pdf [file NIHMS1832479-supplement-Supplemental_Publication_Material.pdf]

**SUPPLEMENTAL MATERIAL**

1. Figure S1.
2. Figure S2.
3. Table S1.
4. Table S2.

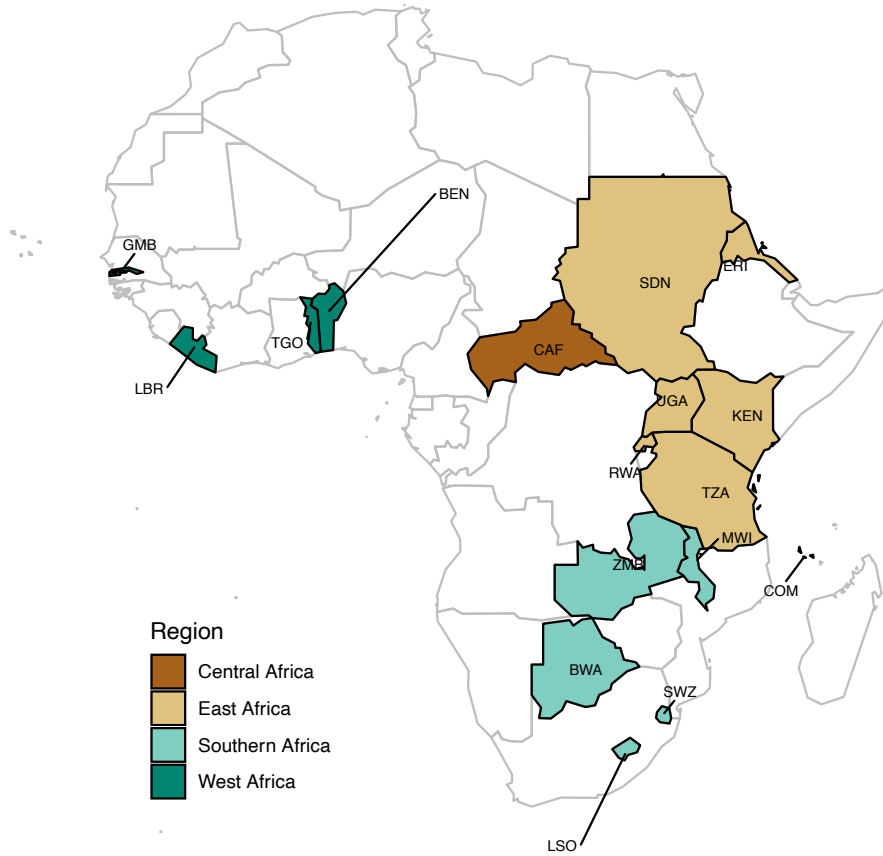

**Figure S1.** Map of countries included in this study, colored by region. Countries are labeled with three-letter codes as follows: BEN = Benin, ERI = Eritrea, MWI = Malawi, TGO = Togo, LBR = Liberia, BAN = Central African Republic (Bangui), OMP = Central African Republic (Bangui & Ombella M’Poko), COM = Comoros, ZMB = Zambia, TZA = Tanzania, ZAN = Tanzania (Zanzibar), LSO = Lesotho, RWA = Rwanda, UGA = Uganda, KEN = Kenya, GMB = The Gambia, SDN = Sudan.

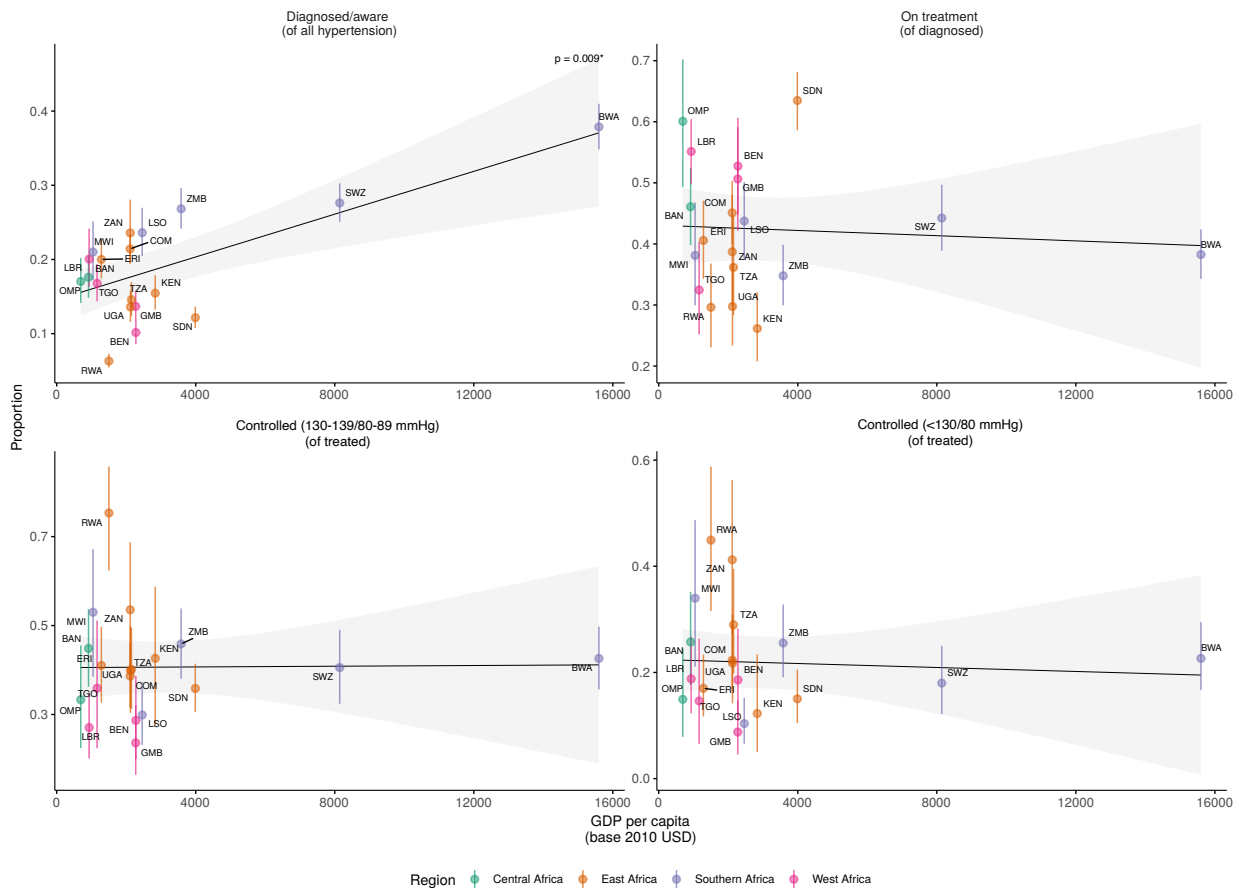

**Figure S2.** Proportion of diagnosed (stage I or higher), treated, and treated and controlled hypertension vs. GDP per capita in base 2010 US dollars (USD) in the country-year of survey collection. The gray shaded region indicates the 95% confidence interval (CI) for the linear regression, while vertical bars represent 95% CI for point estimates. A significant first-order relationship with GDP was noted only for diagnosis ( $p = 0.009$ ), though this appears driven by Eswatini (SWZ) and Botswana (BWA), which had markedly higher GDP than the remaining countries. Countries/subnationals are labeled with three-letter codes as follows: BEN = Benin, ERI = Eritrea, MWI = Malawi, TGO = Togo, LBR = Liberia, BAN = Central African Republic

(Bangui), OMP = Central African Republic (Bangui & Ombella M’Poko), COM = Comoros,  
ZMB = Zambia, TZA = Tanzania, ZAN = Tanzania (Zanzibar), LSO = Lesotho, RWA =  
Rwanda, UGA = Uganda, KEN = Kenya, GMB = The Gambia, SDN = Sudan.

**Table S1.** Characteristics and mean blood pressure values in 17 Sub-Saharan African countries/populations, including three subnational locations, from 2010 – 2017, corresponding to the survey year unless otherwise noted. SDI, sociodemographic index.

| Country                                            | Survey year | SDI   | Population (% female) † | Median population age (years) in 2010 ‡ | Number surveyed (n) | National hypertension guideline available during survey year? §                                           | Mean blood pressure ± SD |           |
|----------------------------------------------------|-------------|-------|-------------------------|-----------------------------------------|---------------------|-----------------------------------------------------------------------------------------------------------|--------------------------|-----------|
|                                                    |             |       |                         |                                         |                     |                                                                                                           | Systolic                 | Diastolic |
| Benin                                              | 2015        | 0.34  | 10,575,962 (50.2)       | 17.9                                    | 5126                | Unknown                                                                                                   | 126.2±0.5                | 82.0±0.3  |
| Botswana                                           | 2014        | 0.61  | 2,088,619 (51.7)        | 22.2                                    | 4070                | Yes; Botswana Primary Care Guidelines for Adults (2013)                                                   | 127.3±0.5                | 79.8±0.4  |
| Central African Republic – Bangui                  | 2010        | 0.28* | 4,386,765 (50.5)*       | 17.7*                                   | 4029                | Unknown                                                                                                   | 128.1±0.6                | 82.1±0.4  |
| Central African Republic – Bangui & Ombella M’Poko | 2017        | 0.30* | 4,596,023 (50.4)*       | 17.7*                                   | 3301                | Unknown                                                                                                   | 125.3±1.2                | 80.9±0.8  |
| Comoros                                            | 2011        | 0.42  | 706,578 (49.6)          | 19.1                                    | 5517                | Unknown                                                                                                   | 127.2±0.4                | 78.3±0.3  |
| Eritrea                                            | 2010        | 0.35  | 3,213,969 (50)          | 19.8                                    | 6265                | Unknown                                                                                                   | 117.3±0.4                | 74.0±0.3  |
| The Gambia                                         | 2010        | 0.35  | 1,793,199 (50.4)        | 17.1                                    | 4103                | Unknown; The Gambia Standard Drug Treatment Guidelines (2021)                                             | 129.9±0.6                | 80.0±0.4  |
| Kenya                                              | 2015        | 0.47  | 47,878,339 (50.3)       | 18.1                                    | 4500                | Yes; Kenya Guidelines for Hypertension Management (2009)                                                  | 124.4±0.5                | 80.6±0.4  |
| Lesotho                                            | 2012        | 0.46  | 2,014,988 (51.2)        | 21.7                                    | 2310                | Yes; Lesotho Standard Treatment Guidelines & Essential Medicines List (2005)                              | 126.1±0.6                | 82.6±0.5  |
| Liberia                                            | 2012        | 0.29  | 4,135,662 (49.9)        | 18.5                                    | 2503                | Yes; Liberia National Therapeutic Guidelines & Essential Medicines List (2011)                            | 128.7±0.7                | 79.7±0.4  |
| Malawi                                             | 2017        | 0.35  | 17,670,193 (50.7)       | 16.6                                    | 4187                | Yes; Malawi Standard Treatment Guidelines, Ministry of Health (2015)                                      | 121.2±0.6                | 74.8±0.4  |
| Rwanda                                             | 2012        | 0.37  | 10,549,668 (50.9)       | 18.9                                    | 7226                | Unknown; Rwandan Ministry of Health Guideline for the Management of Non-Communicable Diseases (2015)      | 120.4±0.3                | 77.7±0.3  |
| Sudan                                              | 2016        | 0.50  | 39,847,433 (50.1)       | 18.3                                    | 7722                | Yes; Sudan Hypertension Guidelines (2012)                                                                 | 127.6±0.3                | 82.8±0.2  |
| Eswatini                                           | 2014        | 0.55  | 1,095,022 (52)          | 19.0                                    | 3534                | Unknown; Swaziland National Noncommunicable Diseases Prevention & Control Policy (2016)                   | 124.0±0.4                | 79.7±0.3  |
| Tanzania                                           | 2012        | 0.37  | 47,053,033 (50.1)       | 17.4                                    | 5680                | Unknown; Tanzania Standard Treatment Guidelines & Essential Medicines List 4 <sup>th</sup> edition (2013) | 128.6±0.4                | 80.3±0.3  |
| Tanzania – Zanzibar                                | 2011        | 0.36* | 45,673,520 (50.1)*      | 17.4*                                   | 2639                | Unknown                                                                                                   | 131.3±1.2                | 78.0±0.6  |
| Togo                                               | 2010        | 0.34  | 6,421,674 (50.4)        | 18.5                                    | 4370                | Unknown                                                                                                   | 120.1±0.9                | 75.0±0.6  |
| Uganda                                             | 2014        | 0.37  | 36,911,530 (50.9)       | 15.4                                    | 3987                | Yes; Uganda Ministry of Health’s National Guidelines for the Management of Common Conditions (2012)       | 124.5±0.4                | 80.6±0.3  |
| Zambia                                             | 2017        | 0.47  | 16,853,608 (50.5)       | 16.2                                    | 4302                | Unknown; Zambia Hypertension Treatment Guidelines (2019)                                                  | 124.4±0.3                | 76.8±0.3  |

\* Subnational locations did not have available population or SDI estimates; therefore, country-wide estimates for that survey year are presented.

† World Bank estimates (56)

‡ Estimates are from most recent preceding year (2010) from the United Nations Population Division (57)

§ Where available, we report the existence and year of national hypertension guidelines in each country, and whether there was a guideline available during that survey-year. If presence of a national guideline or a prior version of a guideline during a survey year could not be confirmed, we denote this as “unknown,” and where available, report the most recent national guideline.

**Table S2.** Prevalence of undiagnosed stage I or higher, diagnosed and untreated, treated, and treated/controlled hypertension at two different diagnostic thresholds in 17 Sub-Saharan African countries, including three subnational locations, from 2010-2017.

| Country                                                  | Prevalence<br>% (95% CI) |                               |                           |                                                |                                       |
|----------------------------------------------------------|--------------------------|-------------------------------|---------------------------|------------------------------------------------|---------------------------------------|
|                                                          | Undiagnosed              | Diagnosed/aware,<br>untreated | Treated<br>(>140/90 mmHg) | Effectively treated<br>(130-139/80-89<br>mmHg) | Effectively treated<br>(<130/80 mmHg) |
| Eritrea                                                  | 28.7 (26.8-30.7)         | 4.3 (3.6-5)                   | 2 (1.5-2.7)               | 0.3 (0.2-0.5)                                  | 0.5 (0.3-0.7)                         |
| Malawi                                                   | 32.8 (28.8-37)           | 5.4 (4.4-6.5)                 | 2 (1.4-2.8)               | 0.2 (0.1-0.3)                                  | 1.1 (0.6-1.8)                         |
| Zambia                                                   | 35.5 (33.4-37.5)         | 8.3 (7.2-9.4)                 | 2.7 (2.2-3.3)             | 0.3 (0.2-0.5)                                  | 1 (0.7-1.4)                           |
| Togo                                                     | 36.5 (34-39)             | 4.9 (4.1-5.8)                 | 1.7 (1.2-2.4)             | 0.2 (0.1-0.4)                                  | 0.3 (0.2-0.6)                         |
| Botswana                                                 | 36.8 (34.3-39.3)         | 13.7 (12.1-15.3)              | 5.9 (5-6.8)               | 0.7 (0.4-1)                                    | 1.9 (1.4-2.6)                         |
| Swaziland                                                | 39.3 (37.2-41.5)         | 7.5 (6.5-8.6)                 | 4.4 (3.7-5.1)             | 0.4 (0.2-0.6)                                  | 1 (0.7-1.6)                           |
| Comoros                                                  | 40.9 (39-42.8)           | 6.1 (5.3-6.9)                 | 3.6 (3-4.3)               | 0.2 (0.1-0.4)                                  | 1.1 (0.8-1.5)                         |
| Tanzania - Zanzibar                                      | 42.8 (38.7-47)           | 8.1 (6.4-10)                  | 2.8 (1.8-4.1)             | 0.2 (0.1-0.5)                                  | 2.1 (1.1-3.5)                         |
| Rwanda                                                   | 42.8 (40.8-44.8)         | 2 (1.7-2.3)                   | 0.4 (0.3-0.6)             | 0 (0-0.1)                                      | 0.4 (0.2-0.6)                         |
| Liberia                                                  | 45.5 (41.8-49.2)         | 4.9 (3.8-6.2)                 | 4.5 (3.7-5.5)             | 0.2 (0.1-0.5)                                  | 1.1 (0.6-1.7)                         |
| Central African<br>Republic – Bangui &<br>Ombella M'Poko | 45.6 (41.5-49.7)         | 3.7 (2.2-5.8)                 | 4.4 (3.5-5.5)             | 0.3 (0.1-0.8)                                  | 0.8 (0.5-1.3)                         |
| Lesotho                                                  | 46.3 (42.5-50.1)         | 7.8 (6.4-9.3)                 | 5 (4.1-6)                 | 0.4 (0.1-0.8)                                  | 0.6 (0.4-1)                           |
| Tanzania                                                 | 48.3 (46.3-50.4)         | 5.2 (3.9-6.6)                 | 1.9 (1.5-2.4)             | 0.1 (0.1-0.3)                                  | 0.8 (0.6-1.2)                         |
| Kenya                                                    | 48.7 (46.1-51.3)         | 6.5 (5.4-7.8)                 | 1.9 (1.4-2.5)             | 0.1 (0-0.2)                                    | 0.3 (0.1-0.6)                         |
| Uganda                                                   | 48.8 (46.5-51)           | 5.3 (4.2-6.5)                 | 1.6 (1.2-2)               | 0.1 (0-0.2)                                    | 0.5 (0.3-0.7)                         |
| Central African<br>Republic - Bangui                     | 50.2 (47.3-53.1)         | 5.7 (4.7-7)                   | 3.3 (2.6-4.1)             | 0.4 (0.2-0.6)                                  | 1.3 (0.8-1.9)                         |
| Gambia                                                   | 52.3 (49.4-55.3)         | 3.8 (2.8-4.9)                 | 3.2 (2.6-3.9)             | 0.3 (0.1-0.5)                                  | 0.3 (0.2-0.6)                         |
| Benin                                                    | 53.3 (50.8-55.7)         | 2.8 (2.2-3.6)                 | 2.5 (2-3.1)               | 0.1 (0-0.2)                                    | 0.6 (0.3-1)                           |
| Sudan                                                    | 58.5 (56.7-60.3)         | 2.9 (2.4-3.5)                 | 3.8 (3.3-4.4)             | 0.5 (0.3-0.6)                                  | 0.8 (0.5-1.1)                         |
